# Supplementary material
Source: PubMed Central journal article supplement (PMC5769816)
Supplement: NIHMS75574-supplement-Supporting_Information.pdf [file NIHMS75574-supplement-Supporting_Information.pdf]

## Supporting Information Figs S1–S6 and Tables S1–S5

Article title: **Comparative genomics of *Fusarium oxysporum* f. sp. *melonis* reveals the secreted protein recognized by the *Fom-2* resistance gene in melon**

Authors: Sarah Maria Schmidt, Joanna Lukasiewicz, Rhys Farrer, Peter van Dam, Chiara Bertoldo, Martijn Rep

Article acceptance date: 29 June 2015

The following Supporting Information is available for this article:

**Fig. S1** Fom001 is a race 1 isolate.

**Fig. S2** *Fom* isolates cluster according to VCG and geographic location, but not according to race.

**Fig. S3** PCR of *Fom* effector candidate genes on genomic and cDNA.

**Fig. S4** Protein alignment of AvrFom2, *Colletotrichum higginsianum* ChEC13 and *Pyrenophora tritici-repentis* ToxA.

**Fig. S5** Melon plants harbouring the *Fom-2* resistance gene are resistant to race 2 isolates that are genetically complemented with *AVRFOM2*.

**Fig. S6** *AVRFOM2* is absent in race 1,2 isolates.

**Table S1** Confirmation of *Fom* races

**Table S2** Coverage of the Fom001 reference genome by the Illumina paired-end sequencing reads of each Fom isolate

**Table S3** Reported SNPs for sequence read mapping to Fom004 genome

**Table S4** Average read depth coverage of candidate effector genes

**Table S5** Primers used in this study

**Table S6** Sequence read average coverage of Fom001 contigs (see separate Excel file)

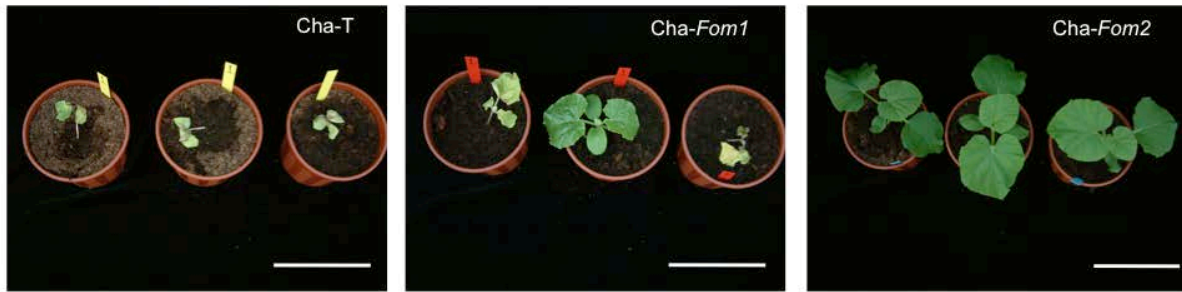

**Fig. S1** Fom001 is a race 1 isolate. Ten-day-old melon seedlings without (Cha-T) or with either the *Fom-1* (Cha-Fom1) or the *Fom-2* (Cha-Fom2) resistance gene were inoculated with conidia of Fom001 (NRRL26406). Pictures were taken 10 d after inoculation. Bars, 15 cm.

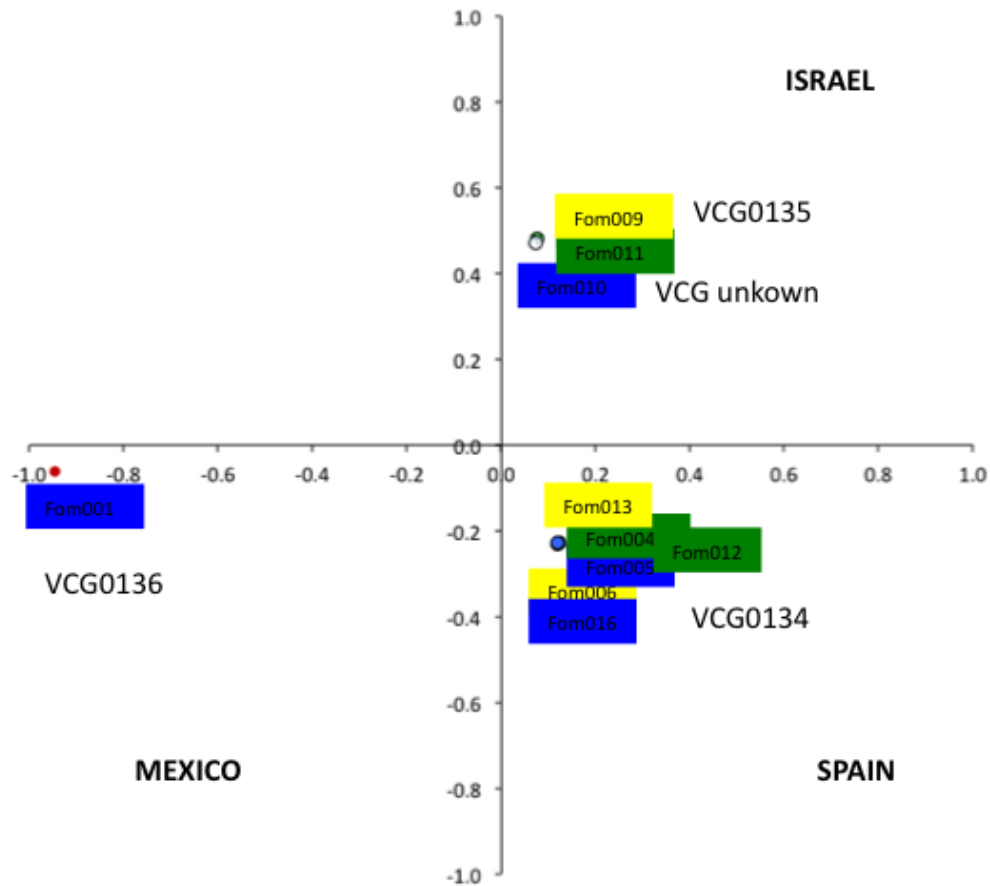

**Fig. S2** *Fom* isolates cluster according to VCG and geographic location, but not according to race. The Illumina paired-end sequencing reads were mapped to the *Fom004* genome using BWA (version 0.7.4-r385 mem) (Li, 2013). Single-nucleotide polymorphisms were called using GATK (see the Materials and Methods section). The variant positions were merged with Tabix v0.2.6 bgzip, tabix, and VCFtools v0.1.9 vcf-merge, to conduct a Principal Components Analysis (PCA) using smartPCA version 9102.

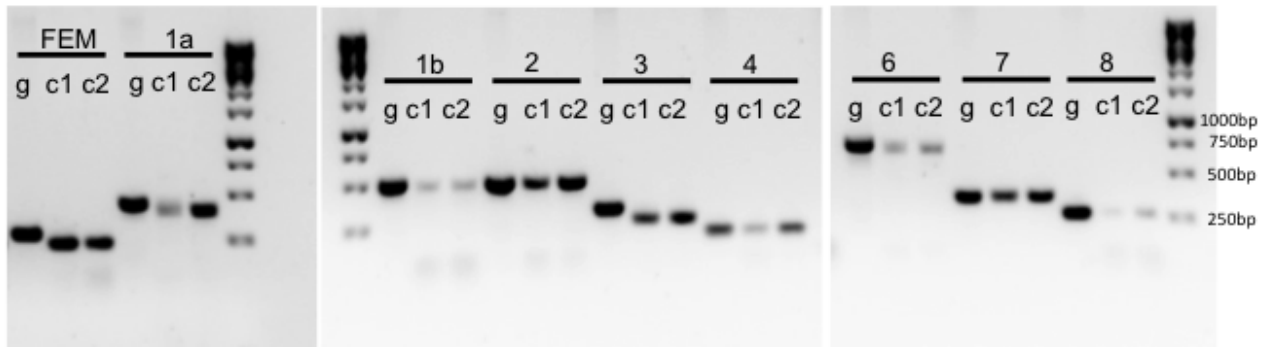

**Fig. S3** PCR of *Fom* effector candidate genes on genomic and cDNA. Genomic DNA (g) was isolated from Fom005 grown on potato dextrose agar (PDA) plates. Reverse transcript-PCR was performed on cDNA made from RNA that was isolated from 5-d-old NO<sub>3</sub>-cultures (c1) or Fom005-infected melon Cha-T seedlings (c2). *FEM*, *Fusarium extracellular matrix* gene (Schoffemeer *et al.*, 2001). Numbers indicate the effector candidates. Effector candidate 5 is absent in Fom005.

```

AvrFom2      MKSFTHILGAFILAMVALVTGAALP-----EESQLDTRTITESQALS----IARR 45 !
ChEC13      ----MKFFASLLAVAPLATSVMSL-----AVDKLDTR----- 28 !
PtrToxA     MRSILVLLFSAAAFLAAPTPEADPGYEIVKLFEAANSSELDARGLSLDWTLLKPRGLLQER 60 !
           :: : * : . * . : : * : *
AvrFom2     QGACISLDIVPRR--VDRAHQTNFQWVIREE-GRTD-WNPNNHVHVLIDA-QTTEFDHRL 100 !
ChEC13     QNSIGATYPVLS--VNHLDRKEFQGEIDQR-GSLG-WLATPDVSVIFDFGATTPANPQL 84 !
PtrToxA     QGSMSITINPSRPSVNNIGQVDIDSVILGRPGAIGSWELNNFITIGLNR-----VNAD 114
           ! ! ! * : * : . * : . : : : * . * . * . : : : :
AvrFom2     TVEITNRSQRFGNAVILSRYAGDTNTGPIQDQIRIPVGTAEGR----TAAFVSRQIRLPS 156 !
ChEC13     NFRILNKNSATWKAVILSNYV-DTITTPARETVRISIDAARKVGTDSIPTILDGCVQLPR 143 !
PtrToxA     TVRVNIRNTGRNRLIITQWDNTVTRGDVYELFGDYALIQGRG-----SFCNLNIRS 165 !
           ! . . . : . : * : : : . : . : . * : : : !
AvrFom2     LQG--TWWWQLEN 167 !
ChEC13     LDG--TWYVQMES 154 !
PtrToxA     DTGRENWRMQLEN 178 !
           * . * * : * . !

```

**Fig. S4** AvrFom2 is weakly similar to ChEC13 and PtrToxA. Protein sequences of AvrFom2 (FOMG\_19011), *Colletotrichum higginsianum* ChEC13 (CCF70887.1) and *Pyrenophora tritici-repentis* ToxA (ADY05382.1) were aligned with ClustalW2. Cysteine residues that form a cysteine knot in ToxA are marked with yellow boxes.

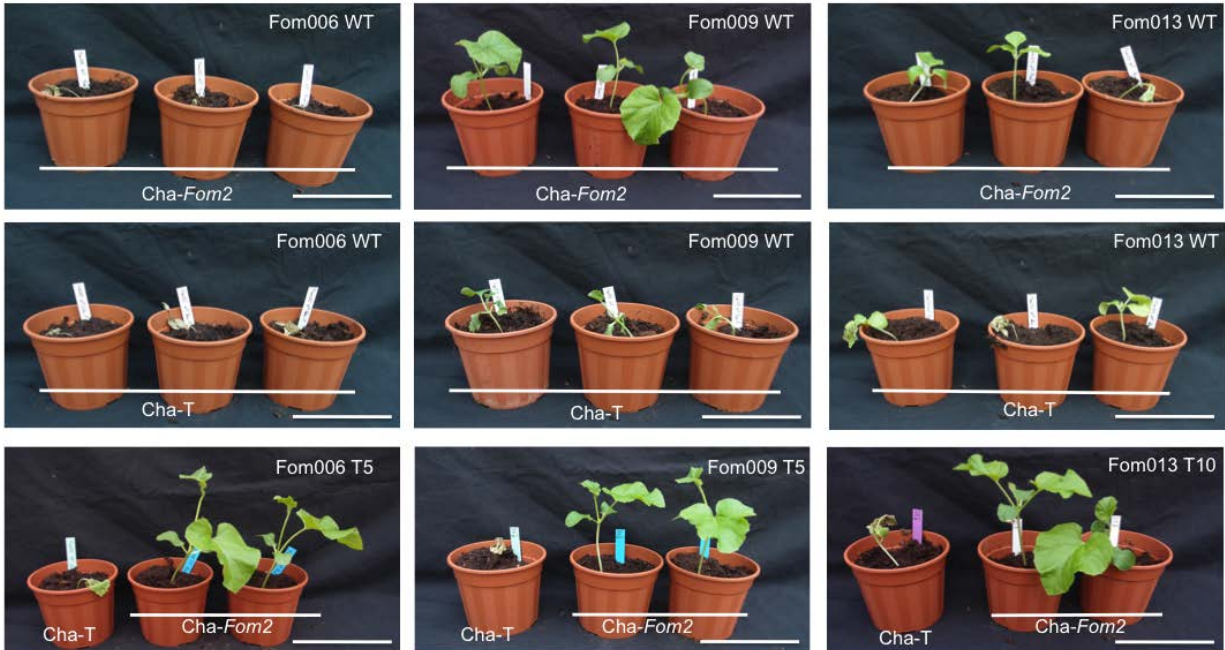

**Fig. S5** Melon plants harbouring the *Fom-2* resistance gene are resistant to race 2 isolates that are ectopically transformed with *AVRFOM2*. Ten-day-old melon seedlings without (Cha-T) or with the *Fom-2* (Cha-*Fom2*) resistance gene were inoculated with conidia of Fom006, Fom009, Fom013 or the ectopic transformants Fom006T5, Fom009T5, Fom013T10. Pictures were taken 9 d after inoculation. Bars, 15 cm.

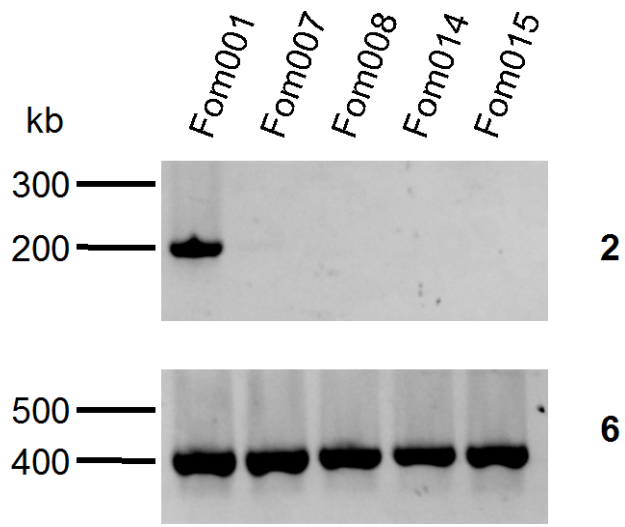

**Fig. S6** *AVRFOM2* is absent in race 1,2 isolates. PCR of *AVRFOM2* and effector candidate 6 was performed on genomic DNA of Fom001 and four different race 1,2 isolates (Fom007, Fom008, Fom014, Fom015) grown for 5 d on PDA plates.

**Table S1** Confirmation of *Fom* races

| <b>Fom isolate</b> | <b>Melon cultivar</b> | <b>Green leaves, no wilting symptoms (%)</b> | <b>Severe wilting symptoms (%)</b> | <b>Dead (%)</b> | <b>Reported race</b> | <b>Our race determination</b> |
|--------------------|-----------------------|----------------------------------------------|------------------------------------|-----------------|----------------------|-------------------------------|
| <b>Fom001</b>      | Cha-T                 | 0                                            | 0                                  | 100             | -                    | <b>race1</b>                  |
|                    | Cha-Fom1              | 10                                           | 30                                 | 60              |                      |                               |
|                    | Cha-Fom2              | 100                                          | 0                                  | 0               |                      |                               |
| <b>Fom004</b>      | Cha-T                 | 10                                           | 0                                  | 90              | race 0               | <b>race 0</b>                 |
|                    | Cha-Fom1              | 100                                          | 0                                  | 0               |                      |                               |
|                    | Cha-Fom2              | 100                                          | 0                                  | 0               |                      |                               |
| <b>Fom005</b>      | Cha-T                 | 0                                            | 0                                  | 100             | race 1               | <b>race 1</b>                 |
|                    | Cha-Fom1              | 0                                            | 0                                  | 100             |                      |                               |
|                    | Cha-Fom2              | 100                                          | 0                                  | 0               |                      |                               |
| <b>Fom006</b>      | Cha-T                 | 0                                            | 0                                  | 100             | race 2               | <b>race 2</b>                 |
|                    | Cha-Fom1              | 100                                          | 0                                  | 0               |                      |                               |
|                    | Cha-Fom2              | 0                                            | 0                                  | 100             |                      |                               |
| <b>Fom009</b>      | Cha-T                 | 0                                            | 100                                | 0               | race 2               | <b>race 2</b>                 |
|                    | Cha-Fom1              | 100                                          | 0                                  | 0               |                      |                               |
|                    | Cha-Fom2              | 0                                            | 90                                 | 10              |                      |                               |
| <b>Fom010</b>      | Cha-T                 | 70                                           | 30                                 | 0               | race 1               | <b>race 1</b>                 |
|                    | Cha-Fom1              | 0                                            | 100                                | 0               |                      |                               |
|                    | Cha-Fom2              | 100                                          | 20                                 | 80              |                      |                               |
| <b>Fom011</b>      | Cha-T                 | 30                                           | 70                                 | 0               | race 0               | <b>race 0</b>                 |
|                    | Cha-Fom1              | 80                                           | 20                                 | 0               |                      |                               |
|                    | Cha-Fom2              | 100                                          | 0                                  | 0               |                      |                               |
| <b>Fom012</b>      | Cha-T                 | 0                                            | 50                                 | 50              | race 0               | <b>race 0</b>                 |
|                    | Cha-Fom1              | 80                                           | 20                                 | 0               |                      |                               |
|                    | Cha-Fom2              | 100                                          | 0                                  | 0               |                      |                               |
| <b>Fom013</b>      | Cha-T                 | 0                                            | 20                                 | 80              | race 2               | <b>race 2</b>                 |
|                    | Cha-Fom1              | 90                                           | 10                                 | 0               |                      |                               |
|                    | Cha-Fom2              | 0                                            | 30                                 | 70              |                      |                               |
| <b>Fom016</b>      | Cha-T                 | 0                                            | 0                                  | 100             | race 1               | <b>race 1</b>                 |
|                    | Cha-Fom1              | 0                                            | 0                                  | 100             |                      |                               |
|                    | Cha-Fom2              | 100                                          | 0                                  | 0               |                      |                               |
| MOCK               | Cha-T                 | 100                                          | 0                                  | 0               |                      |                               |
|                    | Cha-Fom1              | 100                                          | 0                                  | 0               |                      |                               |
|                    | Cha-Fom2              | 100                                          | 0                                  | 0               |                      |                               |



**Table S2** Coverage of the Fom001 reference genome by the Illumina paired-end sequencing reads of each *Fom* isolate

|                                  | <b>Fom0<br/>01</b> | <b>Fom0<br/>04</b> | <b>Fom0<br/>05</b> | <b>Fom0<br/>06</b> | <b>Fom0<br/>09</b> | <b>Fom0<br/>10</b> | <b>Fom0<br/>11</b> | <b>Fom0<br/>12</b> | <b>Fom0<br/>13</b> | <b>Fom0<br/>16</b> |
|----------------------------------|--------------------|--------------------|--------------------|--------------------|--------------------|--------------------|--------------------|--------------------|--------------------|--------------------|
| x coverage <sup>1</sup>          | 106                | 139                | 86                 | 92                 | 142                | 90                 | 91                 | 87                 | 90                 | 92                 |
| Mapped reads <sup>2</sup>        | 83                 | 74                 | 77                 | 79                 | 70                 | 75                 | 77                 | 81                 | 81                 | 79                 |
| Nonspecific matches <sup>3</sup> | 1.28               | 1.46               | 1.44               | 1.4                | 1.93               | 1.91               | 1.53               | 1.28               | 1.17               | 1.3                |
| Nonperfect matches <sup>2</sup>  | 33.77              | 64.03              | 65.33              | 65.6               | 67.83              | 66.59              | 68.84              | 64.96              | 66.02              | 66.04              |
| Fraction of reference covered    | 1                  | 0.86               | 0.86               | 0.85               | 0.84               | 0.82               | 0.84               | 0.85               | 0.83               | 0.85               |

The isolates were sequenced by Illumina using either 180 bp insert size libraries (Fom001), a combination of 170 bp and 500 bp insert size libraries (Fom006, Fom009, Fom010, Fom011, Fom012, Fom013, Fom016) or a combination of 170 bp, 500 bp and 5 kb insert size libraries (Fom004, Fom005).

All reads were mapped to the annotated genome assembly of Fom001. Nonspecific matches are an indication of repetitive sequences, nonperfect matches are an indication of sequence variation.

<sup>1</sup>Genome coverage of Fom001 genome (54 Mb) by sequencing reads. <sup>2</sup>Percentage of all reads.

<sup>3</sup>Percentage of all mapped reads.

**Table S3** Reported single nucleotide polymorphisms (SNPs) for sequence read mapping to *F. oxysporum* f. sp. *melonis* Fom004 genome

| <b>Fom isolate</b> | <b>nt aligned w/<br/>BWA<sup>1</sup></b> | <b>Depth</b> | <b>GATK UG<br/>REF<sup>2</sup></b> | <b>SNPs</b>    | <b>Breadth of<br/>coverage (%)</b> |
|--------------------|------------------------------------------|--------------|------------------------------------|----------------|------------------------------------|
| Fom001             | 6179406543                               | 112.68       | <b>45,528,110</b>                  | <b>832,991</b> | 84.54                              |
| Fom004             | 5621035770                               | 102.50       | <b>54,067,241</b>                  | <b>6,769</b>   | 98.60                              |
| Fom005             | 4595916870                               | 83.80        | <b>53,449,088</b>                  | <b>11,695</b>  | 97.48                              |
| Fom006             | 4918505400                               | 89.69        | <b>51,844,025</b>                  | <b>16,345</b>  | 96.42                              |
| Fom009             | 7396783110                               | 134.88       | <b>47,739,494</b>                  | <b>379,627</b> | 89.46                              |
| Fom010             | 4525896690                               | 82.53        | <b>47,156,275</b>                  | <b>382,904</b> | 88.38                              |
| Fom011             | 4569965640                               | 83.33        | <b>47,712,092</b>                  | <b>379,364</b> | 89.41                              |
| Fom012             | 2890633230                               | 52.71        | <b>51,863,015</b>                  | <b>17,394</b>  | 96.46                              |
| Fom013             | 3107482740                               | 56.66        | <b>50,943,725</b>                  | <b>16,922</b>  | 94.75                              |
| Fom016             | 3092398650                               | 56.39        | <b>52,241,571</b>                  | <b>17,431</b>  | 97.16                              |

<sup>1</sup>Burrows-Wheeler Aligner (BWA, version 0.7.4-r385 mem) (Li, 2013). <sup>2</sup>Genome Analysis Toolkit (GATK, version 2.7-4-g6f46d11) UnifiedGenotyper with reference (REF) base calling enabled and the haploid genotyper ploidy setting.

**Table S4** Average read depth coverage of candidate effector genes

| Super-contig | Start | End   | Name     | Mean base count per isolate |         |         |         |         |         |         |         |         |         |
|--------------|-------|-------|----------|-----------------------------|---------|---------|---------|---------|---------|---------|---------|---------|---------|
|              |       |       |          | Fom_001                     | Fom_004 | Fom_005 | Fom_006 | Fom_009 | Fom_010 | Fom_011 | Fom_012 | Fom_013 | Fom_016 |
| 160          | 4001  | 4556  | Fom_1A   | 43.86                       | 83.17   | 61.42   | 77.63   | 0       | 59.86   | 0       | 69.07   | 77.86   | 83.28   |
| 450          | 1946  | 2494  | Fom_1B   | 45.28                       | 86.80   | 76.07   | 83.27   | 81.87   | 207.80  | 80.25   | 75.22   | 87.99   | 78.60   |
| 236          | 7624  | 8127  | Fom_2    | 39.73                       | 85.64   | 66.77   | 0.01    | 0       | 134.72  | 72.52   | 77.25   | 0       | 79.89   |
| 755          | 769   | 1160  | Fom_3    | 29.48                       | 77.04   | 63.83   | 77.7    | 83.46   | 126.13  | 83.52   | 70      | 71.38   | 165.46  |
| 900          | 1097  | 1291  | Fom_4    | 84.45                       | 131.31  | 124.51  | 157.97  | 195.05  | 365.76  | 213.78  | 141.13  | 144.04  | 151.02  |
| 692          | 502   | 1135  | Fom_5    | 121.96                      | 0       | 0       | 0       | 0       | 0       | 0       | 0       | 0       | 0       |
| 716          | 194   | 1044  | Fom_6    | 80.52                       | 225.96  | 170.82  | 218.73  | 204.51  | 241.34  | 210.46  | 204.81  | 202.56  | 210.95  |
| 449          | 2701  | 3147  | Fom_7    | 39.91                       | 78.3    | 130.41  | 75.34   | 79.22   | 138.70  | 76.34   | 0       | 77.00   | 88.28   |
| 584          | 671   | 1009  | Fom_8    | 104.59                      | 174.22  | 132.76  | 185.30  | 152.31  | 76      | 146.38  | 155.63  | 162.66  | 175.97  |
| 337          | 1016  | 1453  | Fom_LysM | 23.32                       | 78.95   | 55.58   | 71.04   | 70.51   | 60.24   | 65.73   | 79.6    | 75.65   | 77.74   |
| 226          | 11358 | 12005 | Fom_SIX6 | 38.13                       | 95.51   | 71.62   | 76.7    | 0.07    | 0       | 0       | 76.01   | 84.83   | 85.37   |

**Table S5** Primers used in this study

| Primer no. | Orientation | Sequence (5'-3' )        | Target gene     |
|------------|-------------|--------------------------|-----------------|
| 157        | Sense       | ATGAAGTACACTCTCGCTACC    | FEM1            |
| 158        | Anti-sense  | GGTGAAAGTGAAAGAGTCACC    | FEM1            |
| 4520       | Sense       | GCACGCCATGACGTTGAGAA     | Fom effector 1A |
| 4521       | Anti-sense  | CTAGGAGCCTCTTTGATTGC     | Fom effector 1A |
| 4522       | Sense       | ATCCCATATGGCACTGGGCAA    | Fom effector 1B |
| 4523       | Anti-sense  | CTAGTTATGATTGGCGATAAC    | Fom effector 1B |
| 4524       | Sense       | ATGAAGAGCTTCACCCACATCC   | Fom effector2   |
| 4525       | Anti-sense  | GCTGCCACCACCATGTGCCT     | Fom effector2   |
| 4526       | Sense       | ATGAGGTTGCCACGGACAACCTG  | Fom effector3   |
| 4527       | Anti-sense  | GTACTIONGCTTAGGTTGGGGTTC | Fom effector 3  |
| 4528       | Sense       | ATGCTCAATATGAAGATCTTTGC  | Fom effector4   |
| 4529       | Anti-sense  | TTAACCACGGCAGCGGTCTTC    | Fom effector4   |
| 4533       | Sense       | AATGCATCGCCTGCCGAAG      | Fom effector 6  |
| 4534       | Anti-sense  | TAAGTCCGAATGTAAAGTCG     | Fom effector 6  |
| 4535       | Sense       | ACTGGTCATGGCACAGTCTAA    | Fom effector 7  |
| 4536       | Anti-sense  | TCATAGCGAATGTGCCAGAAG    | Fom effector 7  |
| 4537       | Sense       | CCAGCTGTACTAACACATGCA    | Fom effector8   |
| 4538       | Anti-sense  | TCAAATTGCCCGTAGCTGGAT    | Fom effector 8  |

## References

**Li H. 2013.** Aligning sequence reads, clone sequences and assembly contigs with BWA-MEM. *arXiv*: 1303.3997v2 [q-bio.GN].

**Schoffelmeer EAM, Vossen JH, van Doorn AA, Cornelissen BJC, Haring MA. 2001.** FEM1, a *Fusarium oxysporum* glycoprotein that is covalently linked to the cell wall matrix and is conserved in filamentous fungi. *Molecular Genetics and Genomics* **265**: 143–152.
